# Supplementary material for: Increased early mortality and morbidity after total hip arthroplasty in patients with socioeconomic disadvantage: a report from the Swedish Hip Arthroplasty Register
Source: PubMed Central journal article supplement (PMC6534205; doi:10.1080/17453674.2019.1598710), 2019-04-01
Supplement: IORT_A_1598710_SM6333.pdf [file IORT_A_1598710_SM6333.pdf]

## Supplementary data

Table 4. Hazard ratio (HR) for mortality up to 90 days after THA

| Factor                            | %   | n   | Crude HR (95% CI) | p-value | Adjusted HR (95% CI) | p-value |
|-----------------------------------|-----|-----|-------------------|---------|----------------------|---------|
| <b>Age</b>                        |     |     |                   |         |                      |         |
| < 60 years                        | 0.1 | 29  | Ref.              |         | Ref.                 |         |
| 60–75 years                       | 0.2 | 224 | 2.4 (1.6–3.5)     | < 0.001 | 1.9 (1.3–2.8)        | 0.001   |
| > 75 years                        | 0.9 | 456 | 8.9 (6.1–12.9)    | < 0.001 | 5.4 (3.7–7.9)        | < 0.001 |
| <b>Sex</b>                        |     |     |                   |         |                      |         |
| Female                            | 0.3 | 316 | Ref.              |         | Ref.                 |         |
| Male                              | 0.5 | 393 | 1.6 (1.4–1.9)     | < 0.001 | 2.0 (1.7–2.3)        | < 0.001 |
| <b>Year of surgery</b>            |     |     |                   |         |                      |         |
| 1992–1998                         | 0.7 | 299 | Ref.              |         | Ref.                 |         |
| 1999–2005                         | 0.4 | 221 | 0.6 (0.5–0.7)     | < 0.001 | 0.6 (0.5–0.7)        | < 0.001 |
| 2006–2012                         | 0.3 | 189 | 0.4 (0.4–0.5)     | < 0.001 | 0.4 (0.3–0.5)        | < 0.001 |
| <b>Income</b>                     |     |     |                   |         |                      |         |
| Low                               | 0.6 | 355 | Ref.              |         | Ref.                 |         |
| Middle                            | 0.4 | 242 | 0.7 (0.6–0.8)     | < 0.001 | 0.8 (0.7–0.9)        | 0.01    |
| High                              | 0.2 | 112 | 0.3 (0.3–0.4)     | < 0.001 | 0.5 (0.4–0.7)        | < 0.001 |
| <b>Education</b>                  |     |     |                   |         |                      |         |
| Low                               | 0.6 | 450 | Ref.              |         | Ref.                 |         |
| Middle                            | 0.3 | 187 | 0.6 (0.5–0.7)     | < 0.001 | 1.0 (0.8–1.1)        | 0.6     |
| Higher                            | 0.2 | 72  | 0.4 (0.3–0.5)     | < 0.001 | 1.0 (0.7–1.3)        | 0.8     |
| <b>Cohabiting status</b>          |     |     |                   |         |                      |         |
| Cohabiting                        | 0.3 | 326 | Ref.              |         | Ref.                 |         |
| Non-cohabiting                    | 0.6 | 383 | 1.7 (1.4–1.9)     | < 0.001 | 1.6 (1.4–1.9)        | < 0.001 |
| <b>Immigration status</b>         |     |     |                   |         |                      |         |
| Non-immigrant                     | 0.4 | 672 | Ref.              |         | Ref.                 |         |
| Immigrant                         | 0.3 | 37  | 0.7 (0.5–0.9)     | 0.02    | 0.8 (0.6–1.1)        | 0.1     |
| <b>Charlson Comorbidity Index</b> |     |     |                   |         |                      |         |
| Low                               | 0.3 | 388 | Ref.              |         | Ref.                 |         |
| Moderate                          | 1.0 | 245 | 3.7 (3.2–4.3)     | < 0.001 | 3.3 (2.8–3.9)        | < 0.001 |
| High                              | 2.6 | 76  | 9.4 (7.3–12.0)    | < 0.001 | 8.4 (6.5–10.9)       | < 0.001 |
| <b>Hospital type</b>              |     |     |                   |         |                      |         |
| County                            | 0.5 | 574 | Ref.              |         | Ref.                 |         |
| Private                           | 0.2 | 42  | 0.4 (0.3–0.6)     | < 0.001 | 0.7 (0.5–1.0)        | 0.05    |
| University                        | 0.5 | 93  | 1.1 (0.9–1.3)     | 0.5     | 1.0 (0.8–1.2)        | 0.5     |

Number of events = 709; adjusted for age, sex, year of surgery, income, education, cohabiting status, immigration status, Charlson Comorbidity Index and hospital type.

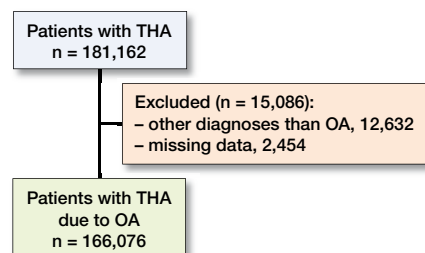

Figure 1. Patient selection.

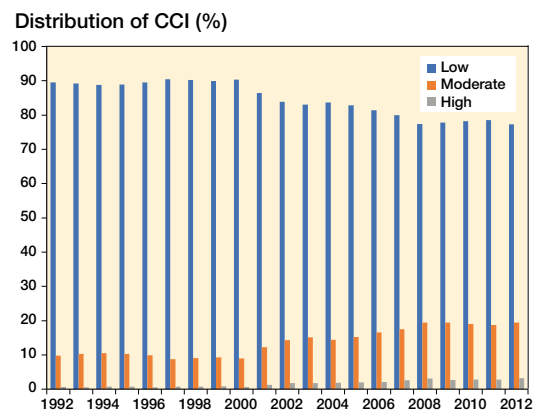

Figure 2. Distribution of Charlson Comorbidity Index (CCI) (low, moderate, and high) divided by year.

Table 5. Hazard ratio (HR) for readmissions for cardiovascular reasons up to 90 days after THA

| Factor                            | %   | n    | Crude HR (95% CI) | p-value | Adjusted HR (95% CI) | p-value |
|-----------------------------------|-----|------|-------------------|---------|----------------------|---------|
| <b>Age</b>                        |     |      |                   |         |                      |         |
| < 60 years                        | 0.1 | 41   | Ref.              |         | Ref.                 |         |
| 60–75 years                       | 0.5 | 478  | 3.7 (2.7–5.0)     | < 0.001 | 3.1 (2.2–4.2)        | < 0.001 |
| > 75 years                        | 1.4 | 689  | 10.7 (7.8–14.7)   | < 0.001 | 7.5 (5.4–10.3)       | < 0.001 |
| <b>Sex</b>                        |     |      |                   |         |                      |         |
| Female                            | 0.6 | 572  | Ref.              |         | Ref.                 |         |
| Male                              | 0.9 | 636  | 1.4 (1.3–1.6)     | < 0.001 | 1.5 (1.4–1.8)        | < 0.001 |
| <b>Year of surgery</b>            |     |      |                   |         |                      |         |
| 1992–1998                         | 0.9 | 402  | Ref.              |         | Ref.                 |         |
| 1999–2005                         | 0.8 | 417  | 0.8 (0.7–0.9)     | 0.003   | 0.8 (0.7–0.9)        | 0.003   |
| 2006–2012                         | 0.6 | 389  | 0.6 (0.5–0.7)     | < 0.001 | 0.5 (0.5–0.6)        | < 0.001 |
| <b>Income</b>                     |     |      |                   |         |                      |         |
| Low                               | 0.9 | 534  | Ref.              |         | Ref.                 |         |
| Middle                            | 0.8 | 439  | 0.8 (0.7–0.9)     | 0.01    | 1.0 (0.8–1.1)        | 0.5     |
| High                              | 0.4 | 235  | 0.5 (0.4–0.5)     | < 0.001 | 0.7 (0.6–0.9)        | 0.001   |
| <b>Education</b>                  |     |      |                   |         |                      |         |
| Low                               | 0.9 | 743  | Ref.              |         | Ref.                 |         |
| Middle                            | 0.6 | 347  | 0.6 (0.5–0.7)     | < 0.001 | 0.9 (0.8–1.0)        | 0.09    |
| Higher                            | 0.4 | 118  | 0.4 (0.3–0.5)     | < 0.001 | 0.7 (0.6–0.9)        | < 0.001 |
| <b>Cohabiting status</b>          |     |      |                   |         |                      |         |
| Cohabiting                        | 0.7 | 643  | Ref.              |         | Ref.                 |         |
| Non-cohabiting                    | 0.8 | 565  | 1.3 (1.2–1.5)     | < 0.001 | 1.2 (1.1–1.4)        | 0.003   |
| <b>Immigration status</b>         |     |      |                   |         |                      |         |
| Non-immigrant                     | 0.7 | 1112 | Ref.              |         | Ref.                 |         |
| Immigrant                         | 0.8 | 96   | 1.1 (0.9–1.3)     | 0.5     | 1.2 (1.0–1.5)        | 0.09    |
| <b>Charlson Comorbidity Index</b> |     |      |                   |         |                      |         |
| Low                               | 0.5 | 699  | Ref.              |         | Ref.                 |         |
| Moderate                          | 1.8 | 429  | 3.8 (3.4–4.3)     | < 0.001 | 3.4 (3.0–3.9)        | < 0.001 |
| High                              | 2.7 | 80   | 6.2 (5.0–7.9)     | < 0.001 | 5.3 (4.2–6.7)        | < 0.001 |
| <b>Hospital type</b>              |     |      |                   |         |                      |         |
| County                            | 0.8 | 945  | Ref.              |         | Ref.                 |         |
| Private                           | 0.5 | 104  | 0.6 (0.5–0.8)     | < 0.001 | 1.0 (0.8–1.2)        | 0.9     |
| University                        | 0.8 | 159  | 1.2 (1.0–1.4)     | 0.05    | 1.2 (1.0–1.4)        | 0.1     |

Number of events = 1,208; adjusted for age, sex, year of surgery, income, education, cohabiting status, immigration status, Charlson Comorbidity Index and hospital type.

Table 6. Hazard ratio (HR) for readmissions for any reason up to 90 days after THA

| Factor                            | %  | n      | Crude<br>HR (95% CI) | p-value | Adjusted<br>HR (95% CI) | p-value |
|-----------------------------------|----|--------|----------------------|---------|-------------------------|---------|
| <b>Age</b>                        |    |        |                      |         |                         |         |
| < 60 years                        | 10 | 24,746 | Ref.                 |         | Ref.                    |         |
| 60–75 years                       | 13 | 12,055 | 1.4 (1.3–1.5)        | < 0.001 | 1.3 (1.3–1.4)           | < 0.001 |
| > 75 years                        | 26 | 12,464 | 2.9 (2.9–3.0)        | < 0.001 | 2.4 (2.3–2.5)           | < 0.001 |
| <b>Sex</b>                        |    |        |                      |         |                         |         |
| Female                            | 17 | 15,905 | Ref.                 |         | Ref.                    |         |
| Male                              | 16 | 11,292 | 0.9 (0.9–0.9)        | < 0.001 | 1.0 (1.0–1.1)           | 0.02    |
| <b>Year of surgery</b>            |    |        |                      |         |                         |         |
| 1992–1998                         | 23 | 10,077 | Ref.                 |         | Ref.                    |         |
| 1999–2005                         | 16 | 8,671  | 0.7 (0.7–0.7)        | < 0.001 | 0.7 (0.7–0.7)           | < 0.001 |
| 2006–2012                         | 13 | 8,449  | 0.5 (0.5–0.6)        | < 0.001 | 0.5 (0.5–0.5)           | < 0.001 |
| <b>Income</b>                     |    |        |                      |         |                         |         |
| Low                               | 19 | 10,858 | Ref.                 |         | Ref.                    |         |
| Middle                            | 17 | 9,464  | 0.9 (0.9–0.9)        | < 0.001 | 1.0 (1.0–1.0)           | 0.7     |
| High                              | 13 | 6,875  | 0.7 (0.6–0.7)        | < 0.001 | 0.9 (0.9–0.9)           | < 0.001 |
| <b>Education</b>                  |    |        |                      |         |                         |         |
| Low                               | 19 | 14,763 | Ref.                 |         | Ref.                    |         |
| Middle                            | 15 | 8,531  | 0.8 (0.8–0.8)        | < 0.001 | 1.0 (1.0–1.0)           | 0.8     |
| Higher                            | 13 | 3,903  | 0.7 (0.7–0.7)        | < 0.001 | 1.0 (0.9–1.0)           | 0.1     |
| <b>Cohabiting status</b>          |    |        |                      |         |                         |         |
| Cohabiting                        | 14 | 13,235 | Ref.                 |         | Ref.                    |         |
| Non-cohabiting                    | 20 | 13,962 | 1.6 (1.5–1.6)        | < 0.001 | 1.4 (1.3–1.4)           | < 0.001 |
| <b>Immigration status</b>         |    |        |                      |         |                         |         |
| Non-immigrant                     | 16 | 24,880 | Ref.                 |         | Ref.                    |         |
| Immigrant                         | 18 | 2,317  | 1.2 (1.1–1.2)        | < 0.001 | 1.2 (1.1–1.2)           | < 0.001 |
| <b>Charlson Comorbidity Index</b> |    |        |                      |         |                         |         |
| Low                               | 15 | 20,487 | Ref.                 |         | Ref.                    |         |
| Moderate                          | 24 | 5,694  | 1.7 (1.6–1.7)        | < 0.001 | 1.7 (1.6–1.7)           | < 0.001 |
| High                              | 34 | 1,016  | 2.6 (2.4–2.7)        | < 0.001 | 2.5 (2.4–2.7)           | < 0.001 |
| <b>Hospital type</b>              |    |        |                      |         |                         |         |
| County                            | 16 | 20,034 | Ref.                 |         | Ref.                    |         |
| Private                           | 13 | 2,816  | 0.8 (0.8–0.9)        | < 0.001 | 1.0 (1.0–1.0)           | 0.6     |
| University                        | 23 | 4,347  | 1.5 (1.5–1.6)        | < 0.001 | 1.4 (1.4–1.4)           | < 0.001 |

Number of events = 27,197; adjusted for age, sex, year of surgery, income, education, cohabiting status, immigration status, Charlson Comorbidity Index and hospital type.

Table 7. Description of the study population during 3 time periods. Values are frequency (%)

|                                   | 1992–1998   | 1999–2005   | 2006–2012   |
|-----------------------------------|-------------|-------------|-------------|
| <b>Sex</b>                        |             |             |             |
| Female                            | 25,225 (56) | 30,820 (57) | 37,810 (56) |
| Male                              | 19,521 (44) | 23,402 (43) | 29,298 (44) |
| <b>Age group</b>                  |             |             |             |
| < 60 years                        | 6,488 (15)  | 9,411 (17)  | 11,525 (17) |
| 60–75 years                       | 24,306 (54) | 28,325 (52) | 37,147 (55) |
| > 75 years                        | 13,952 (31) | 16,486 (31) | 18,436 (28) |
| <b>Charlson Comorbidity Index</b> |             |             |             |
| Low                               | 40,067 (89) | 46,365 (85) | 52,765 (79) |
| Moderate                          | 4,380 (10)  | 7,050 (13)  | 12,495 (18) |
| High                              | 299 (1)     | 807 (2)     | 1,848 (3)   |
